# Supplementary material for: A non-covalently cross-linked self-healing hydrogel for drug delivery: characterization, mechanical strength, and anti-cancer potential
Source: Royal Society of Chemistry journal article supplement (doi:10.1039/d4nj02752c), 2024-01-01
Supplement: d4nj02752c1.pdf [file d4nj02752c1.pdf]

## Supplementary Information

### Non-Covalently Cross-Linked Self-healing Hydrogel for Drug Delivery: Characterization, Mechanical Strength, and Anti-Cancer Potential

Sheetal Jaiswal<sup>a</sup>, Sandeep Kumar<sup>b</sup>, Paramjeet Yadav<sup>a</sup>, Krishtan Pal<sup>a</sup>, Shere Afgan<sup>a</sup>, Arvind Acharya<sup>b</sup>, Ravi Prakash<sup>c</sup>, Pralay Maiti<sup>c</sup> and Rajesh kumar<sup>a\*</sup>

<sup>a</sup> Department of Chemistry, Institute of Science, Banaras Hindu University, Varanasi-221005, India, E-mail: orajesh@bhu.ac.in

<sup>b</sup> Department of Zoology, Institute of Science, Banaras Hindu University, Varanasi-221005, India

<sup>c</sup> School of Materials Science and Technology, Indian Institute of Technology (BHU), Varanasi-221005,

† Footnotes relating to the title and/or authors should appear here.

#### 1. XPS Spectrum of hydrogel

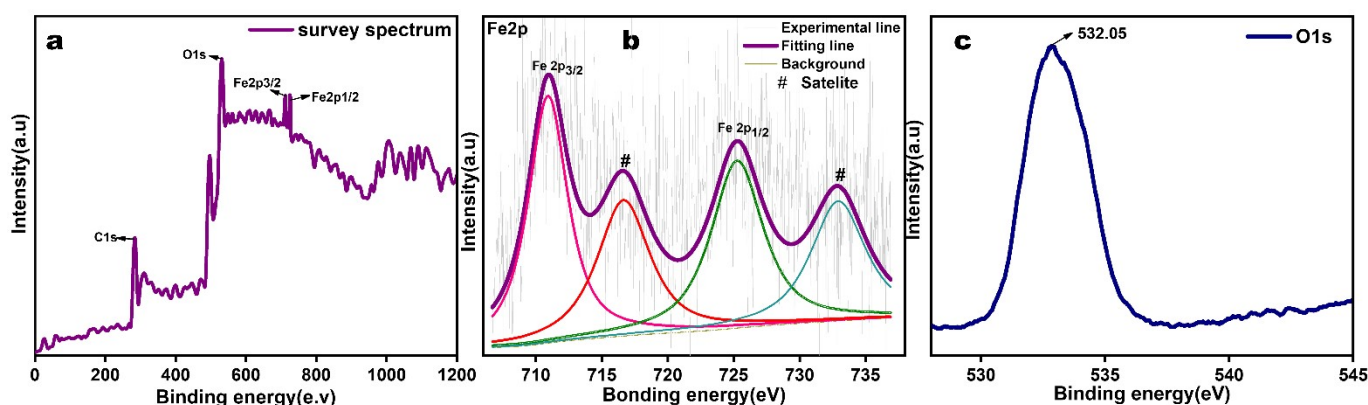

Figure S1. XPS spectra of GGS-PAA-Fe<sup>3+</sup> hydrogel (a) Survey spectrum (b) Fe2p (c) O1s.

#### 2. Self-healing study of hydrogel

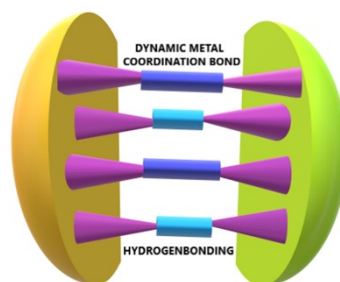

Figure S2. Mechanism of self-healing

## 3. Surface morphology study of hydrogel

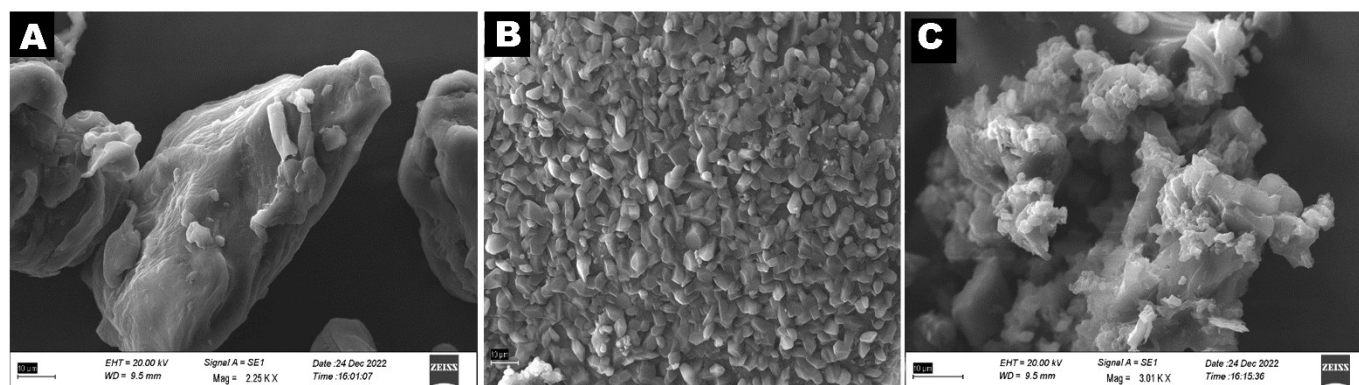

Figure S3. SEM images of (A) GG (B) GGS (C) PAA

## 4. Drug delivery study

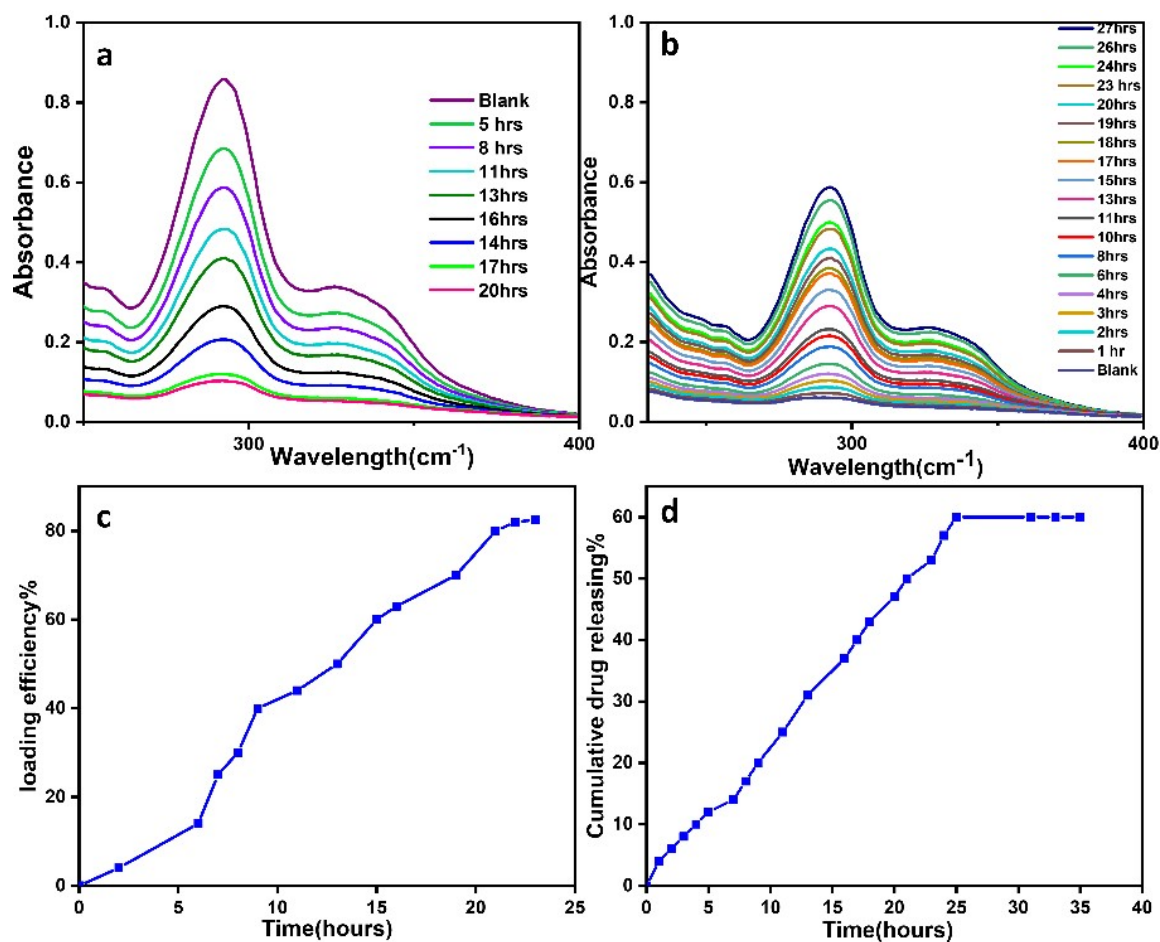Figure S4. Drug loading and releasing efficiency of GGS-PAA-Fe<sup>3+</sup> hydrogel.
